# Supplementary material
Source: PubMed Central journal article supplement (PMC8245358)
Supplement: 125_2021_5463_MOESM1_ESM.pdf [file 125_2021_5463_MOESM1_ESM.pdf]

## Electronic supplementary material

**ESM Table 1. Odds-ratios with 95% confidence intervals of death and/or AICU for different clinical variables after adjusting for age (see Table 1 for sample sizes for each variable)**

| Clinical features                                                                                                       | OR (95% CI)                                    | <i>p</i> value |
|-------------------------------------------------------------------------------------------------------------------------|------------------------------------------------|----------------|
| Sex                                                                                                                     | Male vs female 1.07(0.58-1.99)                 | 0.82           |
| Ethnicity                                                                                                               | Non-white vs white 1.35(0.67-2.74)             | 0.38           |
| BMI                                                                                                                     | Per kg/m2 1.03(0.98-1.08)                      | 0.30           |
|                                                                                                                         | BMI $\geq$ 30 vs <25 <b>2.48(1.00-6.20)</b>    | <b>0.05</b>    |
|                                                                                                                         | BMI 25-29.9 vs < 25 1.27(0.51-3.20)            | 0.32           |
| Admission blood glucose                                                                                                 | Per mmol/l 0.98(0.95-1.02)                     | 0.34           |
|                                                                                                                         | BG $\geq$ 20 vs <10 <b>0.38(0.16-0.91)</b>     | <b>0.04</b>    |
|                                                                                                                         | BG 10-19.9 vs <10 <b>0.36(0.15-0.87)</b>       | <b>0.04</b>    |
| HbA1c (mmol/mol(%))                                                                                                     | Per mmol/mol 0.99(0.98-1.00)                   | 0.06           |
|                                                                                                                         | HbA1c $\geq$ 75(9%) vs <75(9%) 0.57(0.28-1.16) | 0.12           |
| Creatinine                                                                                                              | Per unit <b>1.01(1.01-1.01)</b>                | <b>6.2e-5</b>  |
|                                                                                                                         | Creatinine <74 vs 74-107 0.20(0.06-0.70)       | <b>0.002</b>   |
|                                                                                                                         | Creatinine >107 vs 74-107 1.14(0.47-2.81)      | 0.21           |
| <b>Diabetes Complications</b>                                                                                           |                                                |                |
| DKA on admission                                                                                                        | 0.75(0.36-1.59)                                | 0.46           |
| Diabetic microvascular disease<br>(Diabetic nephropathy, foot ulcer,<br>retinopathy, peripheral neuropathy)             | 1.95(1.00-3.87)                                | <b>0.05</b>    |
| Diabetic macrovascular disease<br>(Peripheral vascular disease, Ischaemic<br>heart disease and Cerebrovascular disease) | 1.52(0.75-3.09)                                | 0.35           |
| <b>Comorbidities</b>                                                                                                    |                                                |                |
| Hypertension                                                                                                            | 1.11(0.56-2.21)                                | 0.77           |
| Dementia                                                                                                                | 2.18(0.79-5.97)                                | 0.13           |
| Asthma                                                                                                                  | 0.56(0.18-1.73)                                | 0.32           |
| COPD                                                                                                                    | 0.78(0.27-2.26)                                | 0.65           |
| Malignant neoplasm                                                                                                      | 0.62(0.20-1.94)                                | 0.41           |
| <b>Treatment on admission</b>                                                                                           |                                                |                |
| Metformin                                                                                                               | 0.54(0.16-1.81)                                | 0.32           |
| ACE-I/ARB                                                                                                               | 1.57(0.77-3.23)                                | 0.21           |

**ESM Table 2. Odds-ratios with 95% confidence intervals of death alone for different clinical variables after adjusting for age.**

| Clinical features                                                                                                       | OR (95% CI)                                       | <i>p</i> value |
|-------------------------------------------------------------------------------------------------------------------------|---------------------------------------------------|----------------|
| Sex                                                                                                                     | Male vs female 1.45(0.71-2.96)                    | 0.31           |
| Ethnicity                                                                                                               | Non-white vs white 1.21(0.54-2.67)                | 0.64           |
| BMI                                                                                                                     | BMI $\geq$ 30 vs $<$ 25 1.41(0.52-3.87)           | 0.30           |
|                                                                                                                         | BMI 25-29.9 vs $<$ 25 1.15(0.42-3.15)             | 0.79           |
| Admission blood glucose                                                                                                 | BG $\geq$ 20 vs $<$ 10 0.61(0.23-1.66)            | 0.34           |
|                                                                                                                         | BG 10-19.9 vs $<$ 10 0.75(0.29-1.96)              | 0.56           |
| HbA1c (mmol/mol(%))                                                                                                     | HbA1c $\geq$ 75(9%) vs $<$ 75(9%) 0.67(0.29-1.51) | 0.33           |
| Creatinine                                                                                                              | Creatinine $<$ 74 vs 74-107 0.25(0.07-0.89)       | <b>0.04</b>    |
|                                                                                                                         | Creatinine $>$ 107 vs 74-107 0.82(0.29-2.32)      | 0.27           |
| <b>Diabetes Complications</b>                                                                                           |                                                   |                |
| DKA on admission                                                                                                        | 0.63(0.24-1.69)                                   | 0.36           |
| Diabetic microvascular disease<br>(Diabetic nephropathy, foot ulcer,<br>retinopathy, peripheral neuropathy)             | 1.53(0.68-3.41)                                   | 0.20           |
| Diabetic macrovascular disease<br>(Peripheral vascular disease, Ischaemic<br>heart disease and Cerebrovascular disease) | 2.37(1.09-5.16)                                   | <b>0.02</b>    |
| <b>Comorbidities</b>                                                                                                    |                                                   |                |
| Hypertension                                                                                                            | 0.88(0.41-1.86)                                   | 0.73           |
| Dementia                                                                                                                | 2.34(0.81-6.77)                                   | 0.11           |
| Asthma                                                                                                                  | 0.40(0.08-1.96)                                   | 0.26           |
| COPD                                                                                                                    | 0.59(0.19-1.80)                                   | 0.35           |
| Malignant neoplasm                                                                                                      | 0.52(0.15-1.86)                                   | 0.32           |
| <b>Treatment on admission</b>                                                                                           |                                                   |                |
| Metformin                                                                                                               | 1.05(0.08-13.23)                                  | 0.88           |
| ACE-I/ARB                                                                                                               | 1.59(0.71-3.56)                                   | 0.26           |

**ESM Figure 1. Distribution of number of T1D deaths over time since admission to hospital.**

**Total deaths N = 53**

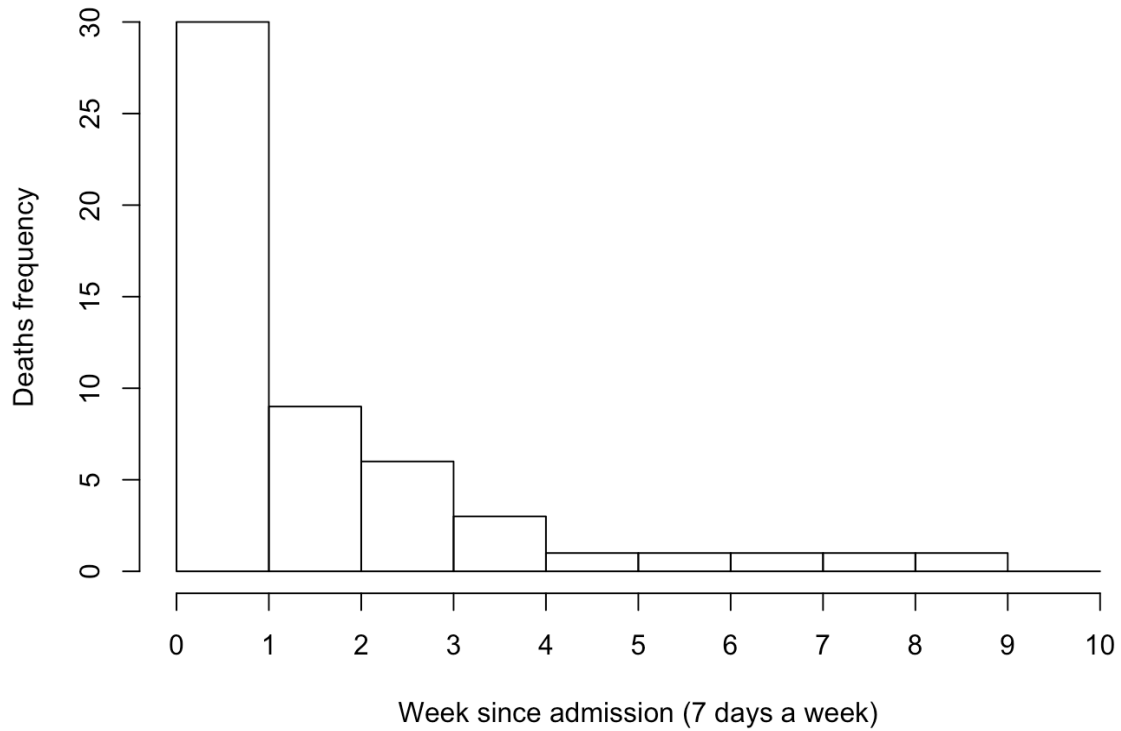

**ESM Figure 2. Distribution of eGFR categories in the T1D population (eGFR calculated from pre-admission creatinine levels using the following formula: eGFR from the MDRD equation =  $186 \times (\text{Creatinine}/88.4)^{-1.154} \times (\text{Age})^{-0.203} \times (0.742 \text{ if female}) \times (1.210 \text{ if black})$ ).**

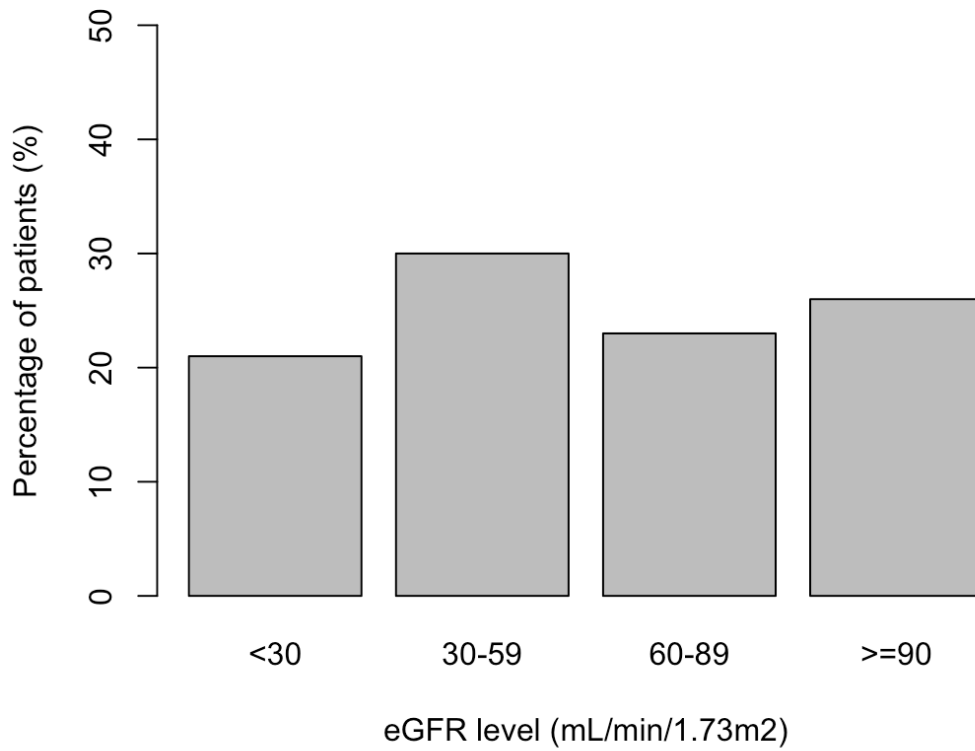

## **Collaborators**

### **England**

Barts Health NHS Trust, Newham University Hospital, London, UK: Amy Edwards; Susan Gelding; Kirun Gunganah.

Brighton and Sussex University Hospitals NHS Trust, Royal Sussex County Hospital, Brighton, UK: Ali Chakera; Dominique Rouse.

Dartford and Gravesham NHS Trust, Darent Valley Hospital, Dartford, UK: Amir Hayat; Cynthia Mohandas.

East and North Hertfordshire NHS Trust, Lister Hospital, Stevenage, UK: Htet Aung; Su Khant Chel; Nyan Lin; Kavitia Narula; Furrug Quadri; Su Lei Yin; Yin Yin.

East Kent Hospitals University NHS Foundation Trust, William Harvey Hospital, Ashford, UK: Alamin Alkundi; Abdelmajid Musa.

East Suffolk and North Essex NHS Foundation Trust, Colchester General Hospital, Colchester, UK: Emma Birbeck; Charles Bodmer.

East Sussex Healthcare NHS Trust, Conquest Hospital & Eastbourne District General Hospital, Hastings, UK: Irene Bossman; Sathis Kumar; Umesh Dashora; Elizabeth Toubi; Mansoor Zafar.

George Eliot Hospital NHS Trust, Diabetes Care Team, George Eliot Hospital, Nuneaton, UK: Vinod Patel; Amitha Gopinath.

Hull University Teaching Hospitals NHS Foundation Trust, Hull Royal Infirmary, Hull, UK: Belinda Allan.

King's College Hospital NHS Foundation Trust, King's College Hospital, London, UK: Dharshana Appuhamillage; Khubaib Ayoub; Sophie Harris; Charmaine Ilangaratne; Maliha Iqbal; Rory Maclean; Omar Mustafa.

Lancashire Teaching Hospitals NHS Foundation Trust, Royal Preston Hospital, Preston, UK: Susan Baxter.

London North West University Healthcare NHS Trust, Ealing Hospital, London, UK: Malgorzata Adamus; Kevin Baynes.

Maidstone and Tunbridge Wells NHS Trust, Maidstone Hospital, Maidstone, UK: Siva Sivappriyan.

Mid Yorkshire Hospitals NHS Trust, Pinderfields Hospital, Wakefield, UK: Ryan D'Costa; Dinesh Nagi.

North Bristol NHS Trust, Southmead Hospital, Bristol, UK: Vernon Parfitt.

North West Anglia NHS Foundation Trust, Hinchingsbrooke Hospital, Huntingdon, UK: Sadia Nasir.

Oxford University Hospitals NHS Foundation Trust, John Radcliffe Hospital, Oxford, UK: Rustam Rea; Gail Roadknight; Kinga Várnai; Senthil Vasan.

Pennine Acute Hospitals NHS Trust, Diabetes Centre, North Manchester General Hospital, Manchester, UK: Vilashini Arul Devah.

Royal Berkshire NHS Foundation Trust (Berkshire Healthcare NHS Foundation Trust), Centre for Diabetes & Endocrinology, Reading, UK: Foteini Kavvoura.

Royal Devon and Exeter NHS Foundation Trust, Royal Devon and Exeter Hospital (Wonford), Exeter, UK: Lina Ficken; James Gilham; Vincent Simpson; Neil Walker.

Royal Free London NHS Foundation Trust, Royal Free Hospital, London, UK: Miranda Rosenthal; Efthimia Karra.

Salford Royal NHS Foundation Trust, Salford Royal Hospital, Salford, UK: Tracy Curran; Angela Paisley.

Sandwell & West Birmingham NHS Trust, City Hospital, Birmingham, UK: Melissa Cull; Parijat De; Priscilla Sarker; Robert Ryder.

Sheffield Teaching Hospitals NHS Foundation Trust, Northern General Hospital, Sheffield, UK: Rajiv Gandhi.

Surrey & Sussex Healthcare NHS Trust, East Surrey Hospital, Redhill, UK: James Clark; Vesna Hogan; Lauren Jackson; Jamie-Leigh Williamson; Younes R. Younes.

The Newcastle Upon Tyne Hospitals NHS Foundation Trust, The Royal Victoria Infirmary, Newcastle Upon Tyne, UK: Lydia Grixti; Suann Tee.

University Hospital of Derby and Burton NHS Foundation Trust, Royal Derby Hospital and Queen's Hospital Burton, Burton-on-Trent, UK: Abilash Sathya; Emma Wilmot.

University Hospital Southampton NHS Foundation Trust, Diabetes at UHSNHSFT, Southampton, UK: Mayank Patel.

University Hospitals Birmingham NHS Foundation Trust, Heartlands Hospital, Birmingham, UK: Catherine Holmes.

University Hospitals Birmingham NHS Foundation Trust, University Hospital of Birmingham, Birmingham, UK: Wasim Hanif; Sandip Ghosh; Parth Narendran.

University Hospitals of Leicester NHS Trust, Diabetes Research Centre, Leicester General Hospital, Leicester, UK: Ehtasham Ahmad; Ejaz Ahmed, Melanie Davies; Kamlesh Khunti; David Webb.

University of Leicester, Leicester, UK: Ben Maylor.

University of Oxford, Oxford, UK: Jim Davies; Oliver Freeman; Steve Harris; Yue Ruan.

West Suffolk Hospital NHS Foundation Trust, West Suffolk Hospital, Bury Saint Edmunds, UK: Anupam Brahma.

Yeovil District Hospital NHS Foundation Trust, Yeovil District Hospital, Yeovil, UK: Seshadri Pramodh.

### **Scotland**

NHS Forth Valley, Forth Valley Royal Hospital, Larbert, UK: Katy Frew; Alison Mackenzie; Abigail Wild.

NHS Greater Glasgow and Clyde, Queen Elizabeth University Hospital, Glasgow, UK: Helen Casey; Deborah Morrison; Conor McKeag; Anne Sillars; Angus Stirling.

### **Wales**

Aneurin Bevan University Health Board, Nevill Hall Hospital, Abergavenny, UK: Fiona Smeeton.

Aneurin Bevan University Health Board, Royal Gwent Hospital, Newport, UK: Syed Muhammad; Kofi Obuobie; Win Yin.

Cardiff & Vale University Health Board, University Hospital of Wales, Cardiff, UK: Sai Ambati; Rahim Khan; Preethi Nalla; Arshiya Tabasum.

Hywel Dda University Health Board, Glangwili General Hospital, Carmarthen, UK: Stamatios Zouras.

Hywel Dda NHS Trust, Prince Philip Hospital, Llanelli, UK: Akhila Mallipedhi.

Swansea Bay University Health Board, Singleton Hospital, Swansea, UK: Richard Chudleigh; David Williams.
